# Supplementary material for: Genomic Mutations in SARS-CoV-2 Genome following Infection in Syrian Golden Hamster and Associated Lung Pathologies
Source: MDPI journal article supplement (doi:10.3390/pathogens12111328), 2023-11-08
Supplement: s1 [file s1]

**Supplementary table; S1:** The comparison of the SNPs

| Position in NC_045512.2 Reference sequence | Reported Base in NC_045512.2 sequence | Identified Alternate Base In the stock virus used in infection | Identified Alternate Base in the viral genome isolated from an infected lung (Female) | Identified Alternate Base in the viral genome isolated from an infected lung (Male) | Gene Name | Protein change |
|--------------------------------------------|---------------------------------------|----------------------------------------------------------------|---------------------------------------------------------------------------------------|-------------------------------------------------------------------------------------|-----------|----------------|
| 17827                                      | C                                     | C                                                              | A                                                                                     | A                                                                                   | ORF1ab    | Gln5855Lys     |
| 21801                                      | A                                     | A                                                              | G                                                                                     | G                                                                                   | S         | Asp80Gly       |
| 21849                                      | A                                     | A                                                              | C                                                                                     |                                                                                     | S         | Glu96Ala       |
| 22206                                      | A                                     | A                                                              | G                                                                                     | G                                                                                   | S         | Asp215Gly      |
| 22296                                      | A                                     | G                                                              | -                                                                                     | A                                                                                   | S         | His245Arg      |
| 23014                                      | A                                     | A                                                              | C                                                                                     | C                                                                                   | S         | Glu484Asp      |
| 23525                                      | C                                     | C                                                              | T                                                                                     | T                                                                                   | S         | His655Tyr      |
| 24734                                      | C                                     | C                                                              | T                                                                                     | T                                                                                   | S         | His1058Tyr     |
| 8782                                       | C                                     | T                                                              | T                                                                                     | T                                                                                   | ORF1ab    | Ser2839Ser     |
| 18060                                      | C                                     | T                                                              | T                                                                                     | T                                                                                   | ORF1ab    | Leu5932Leu     |
| 21759                                      | A                                     | G                                                              | A                                                                                     | A                                                                                   | S         | SHis66Arg      |
| 22482                                      | C                                     | T                                                              | T                                                                                     | T                                                                                   | S         | Thr307Ile      |
| 23606                                      | C                                     | T                                                              | C                                                                                     | C                                                                                   | S         | Arg682Trp      |
| 23607                                      | G                                     | T                                                              | G                                                                                     | G                                                                                   | S         | Arg682Leu      |
| 28144                                      | T                                     | C                                                              | C                                                                                     | C                                                                                   | ORF8      | Leu84Ser       |

**Supplementary Table; S1:** The comparison of the SNPs identified in the virus stock (used in infection) and the virus genome isolated from the lungs of infected hamsters (female and male) with the reference sequence (NC\_045512.2). The SNPs identified in the viral RNA isolated from the infected hamsters (female and male) and stock virus (used in infection) were compared with the reference sequence (NC\_045512.2). The difference in genetic mutations between the reference sequence (NC\_045512.2), virus stock (used in infection), and the virus genome isolated from the lungs of infected hamsters is highlighted. Protein change remains the same in both males and females.
